# Supplementary material for: Recent Strengthening of the ENSO Influence on the Early Winter East Atlantic Pattern
Source: MDPI journal article supplement (doi:10.3390/atmos14121809), 2023-12-11
Supplement: s1 [file s1]

# Supplementary Materials:

Jiayi Hou <sup>1,2</sup>, Zheng Fang <sup>1,2</sup> and Xin Geng <sup>1,2,3,\*</sup>

<sup>1</sup> CIC-FEMD/ILCEC, Key Laboratory of Meteorological Disaster of Ministry of Education (KLME), Nanjing University of Information Science and Technology, Nanjing 210044, China

<sup>2</sup> School of Atmospheric Science, Nanjing University of Information Science and Technology, Nanjing 210044, China

<sup>3</sup> Division of Environmental Science and Engineering, Pohang University of Science and Technology, Pohang 37673, Republic of Korea

\* Correspondence: gengxin@nuist.edu.cn

This document contains six Supplementary figures with legends. The context and relevance of these figures are mentioned in the main text where appropriate.

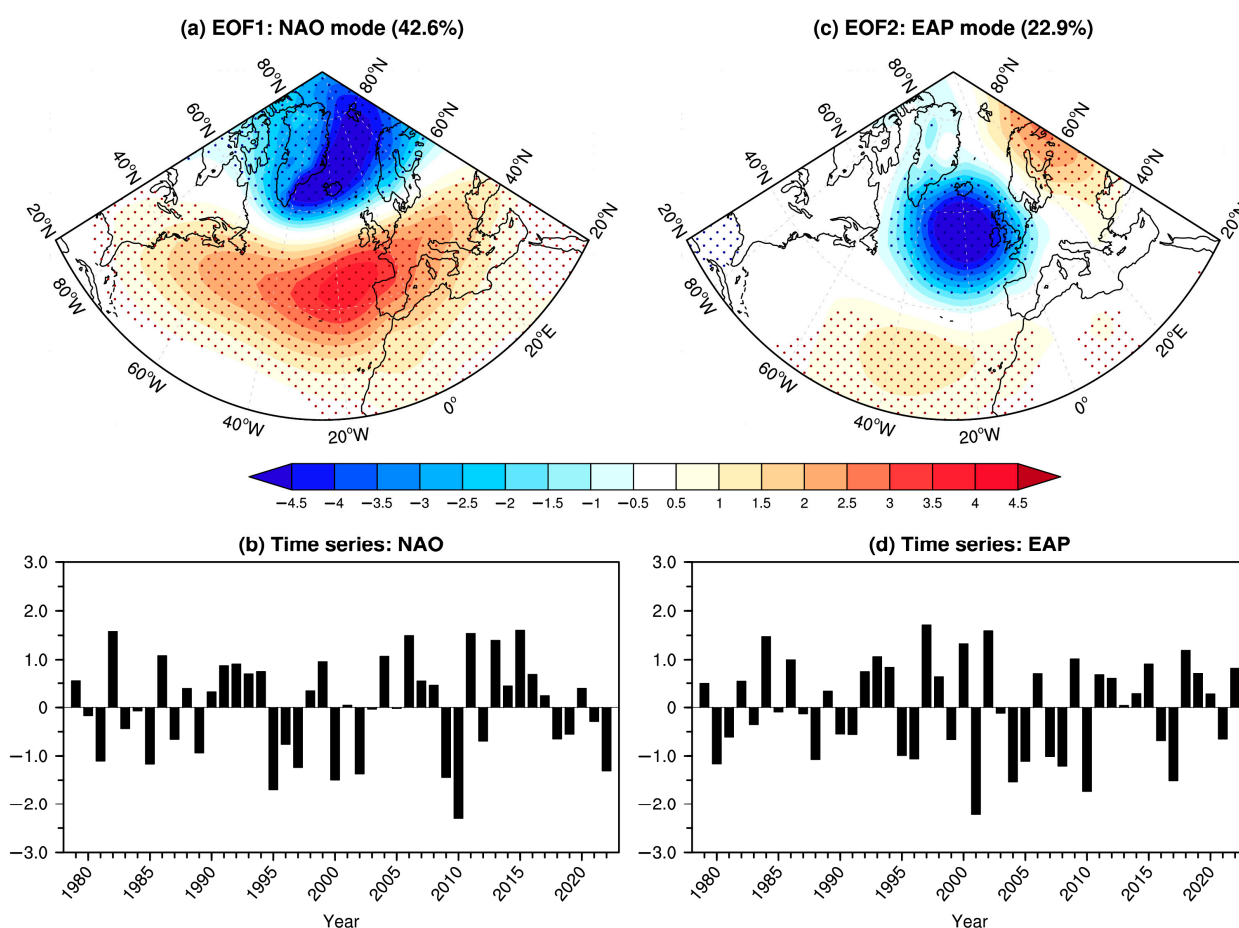

**Figure S1.** The (a) first and (c) second EOF spatial patterns (shading in hPa) and the corresponding (b) first and (d) second normalized time series (representing the NAO and EAP indices, respectively) of the early winter SLP anomalies in the North Atlantic region during 1979–2022 based on the NCEP/NCAR reanalysis dataset. The percentages in (a) and (c) are the variability explained by the corresponding EOF. The dots in (b) indicate the anomalies that exceeded the 95% confidence level.

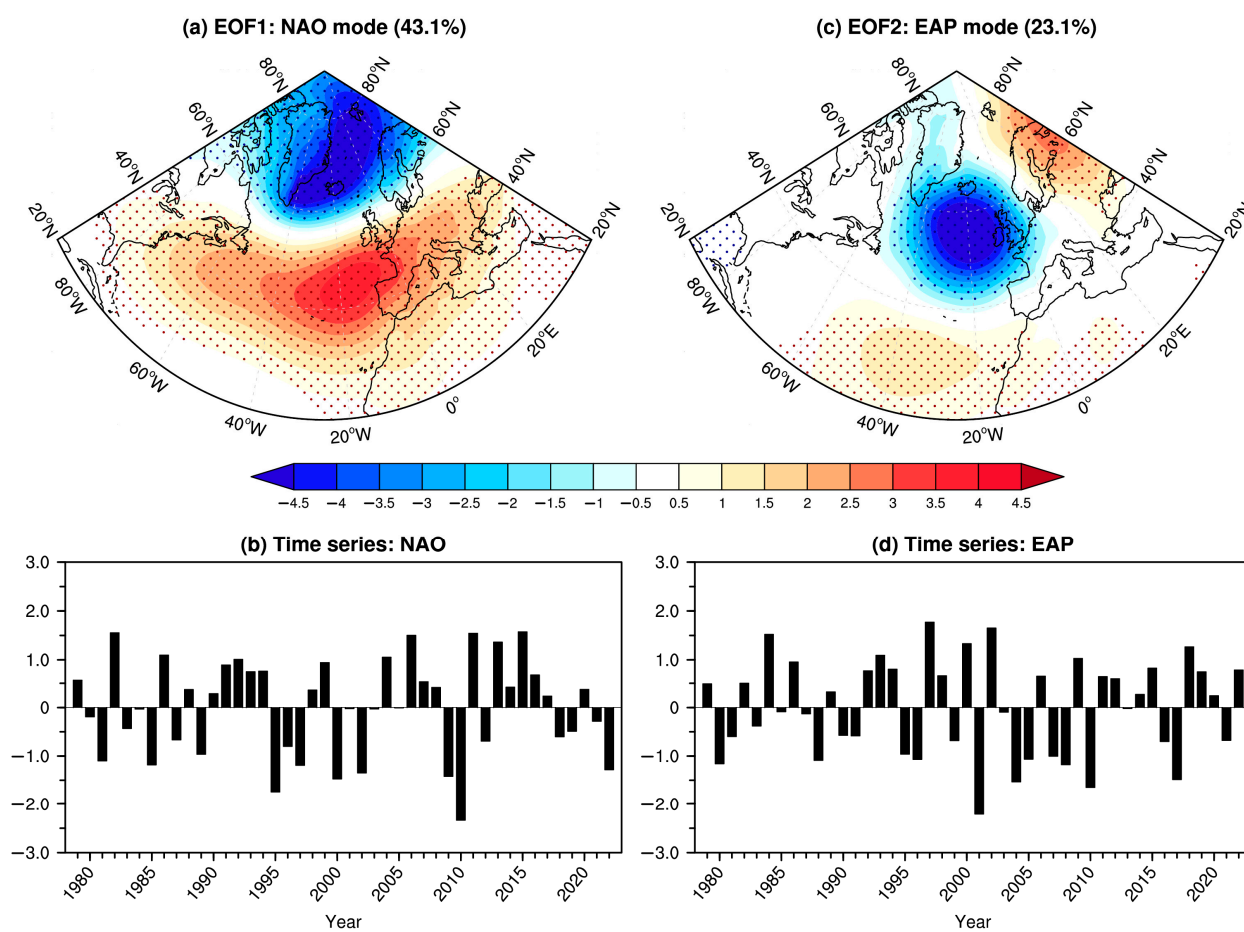

**Figure S2.** The same as Figure S1 but for the results calculated based on the JRA-55 Reanalysis dataset.

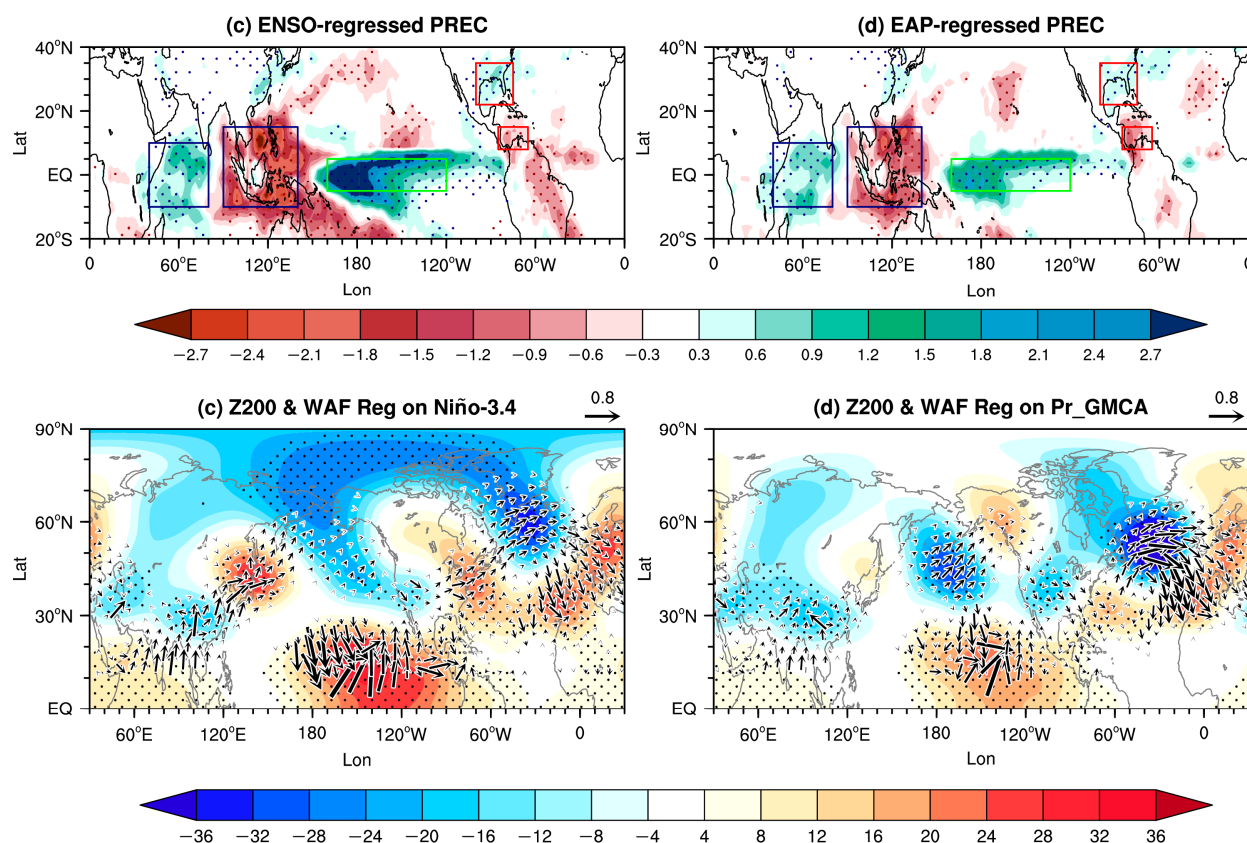

**Figure S3.** Regression coefficients of the early winter tropical precipitation anomalies (calculated based on the CMAP precipitation dataset, shading in  $\text{mm day}^{-1}$ ) with respect to the (a) DJF Niño-3.4 and (b) early winter EAP indices. Regression coefficients of the early winter 200-hPa geopotential height anomalies (shading in m) and the associated anomalous wave activity flux (WAF, vectors in  $\text{m}^2 \text{s}^{-2}$ ) with respect to the (c) DJF Niño-3.4 and (d) early winter Pr\_GMCA (calculated based on the CMAP precipitation dataset) indices. The dots indicate the anomalies that exceed the 95% confidence level. The navy, green and red boxes in (a) and (b) mark the domains used to define the Pr\_TWEIO, Pr\_CP and Pr\_GMCA indices, respectively. The anomalous WAF flux in (c) and (d) is shown only when its magnitude is larger than  $0.1 \text{ m}^2 \text{s}^{-2}$ .

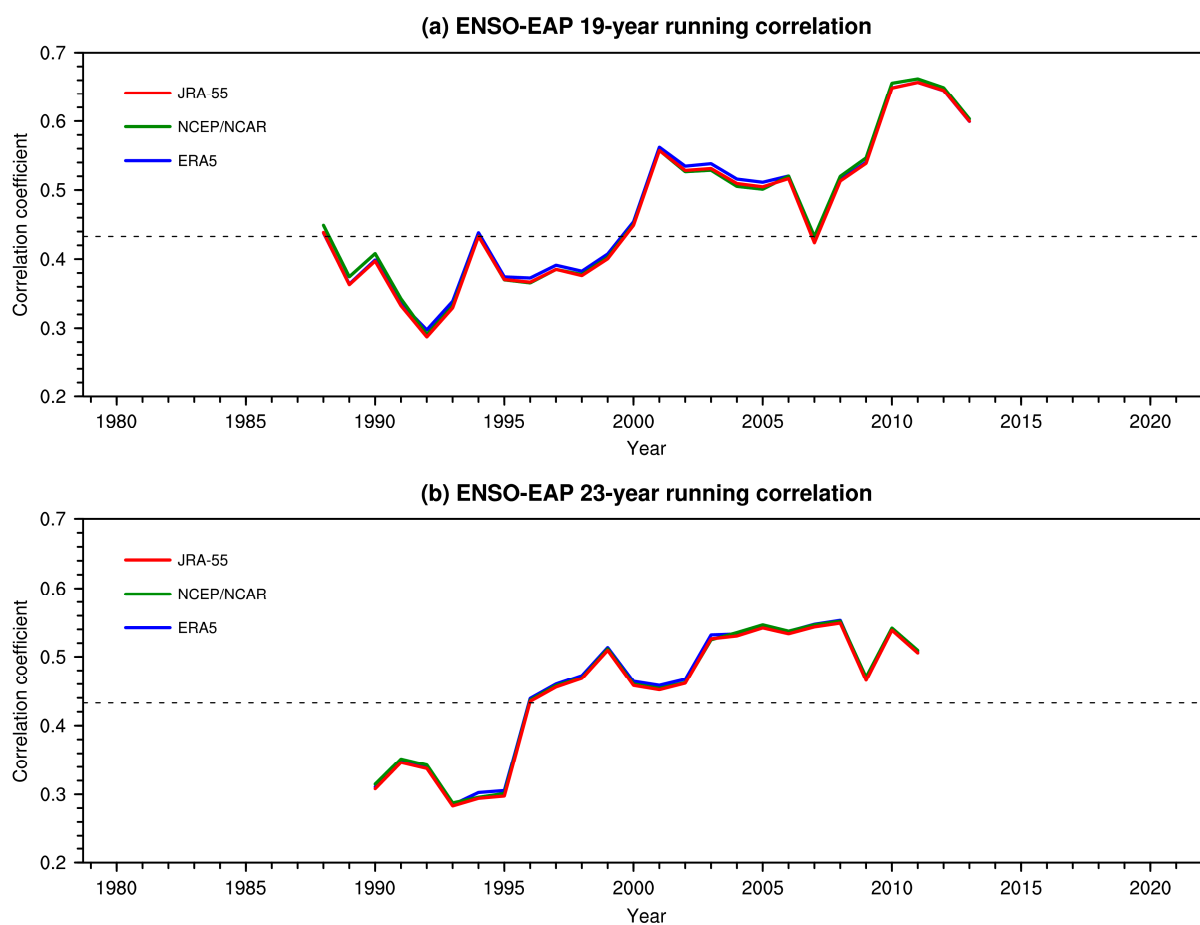

**Figure S4.** The (a) 19-year and (b) 23-year running correlation coefficients between the DJF Niño3.4 index and early winter EAP index during 1979–2022 based on the JRA-55 (red curve), NCEP/NCAR (green curve), and ERA5 (blue curve) reanalysis datasets. The horizontal gray dashed line indicates the 95% confidence level for the correlation.

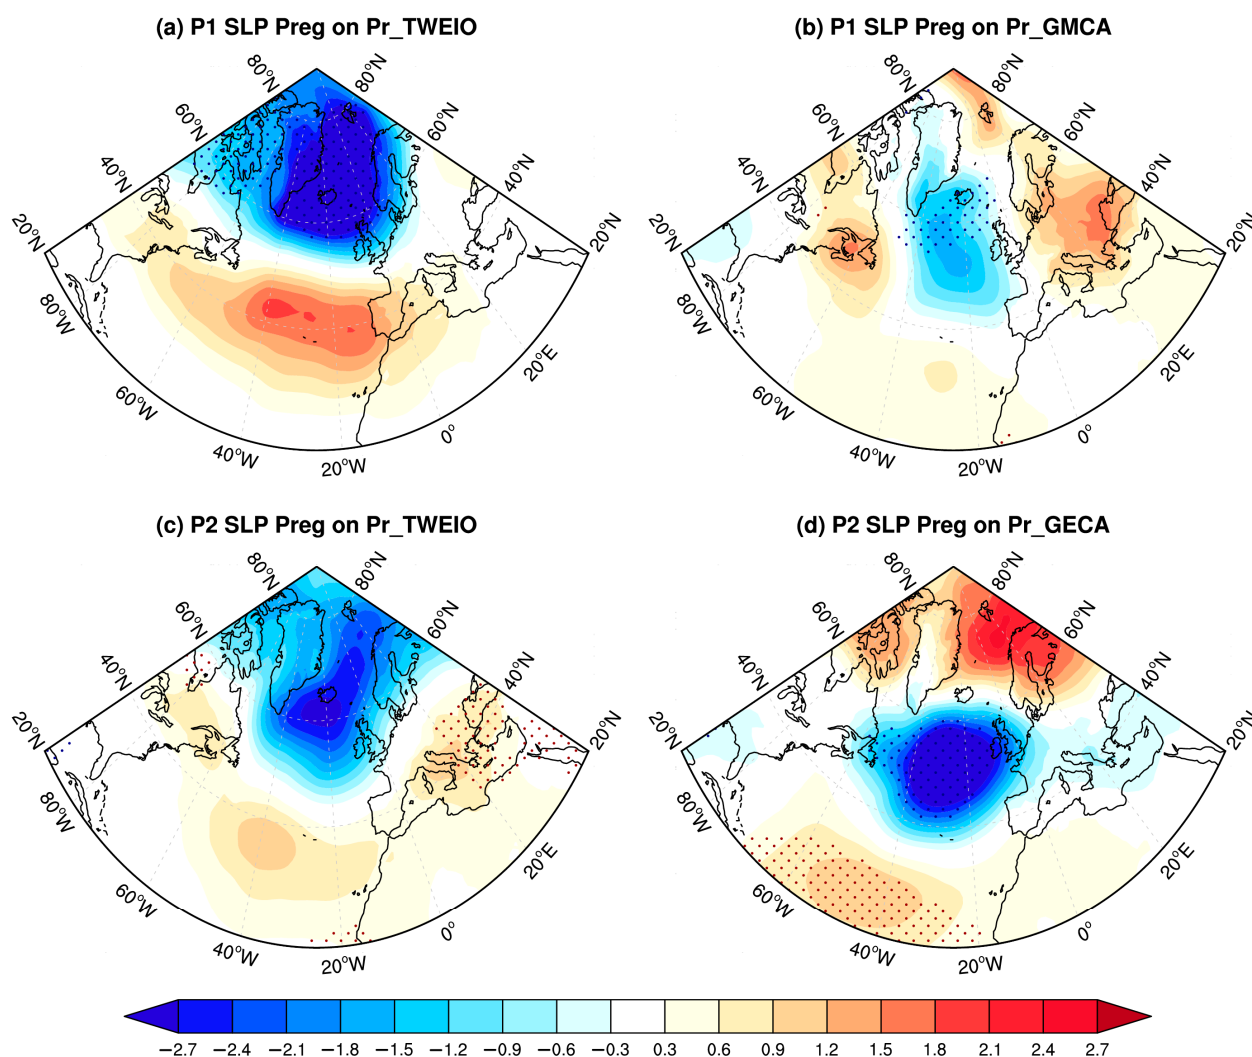

**Figure S5.** Partial regression coefficients of the Euro-Atlantic SLP anomalies (shading in hPa) with respect to the (a) Pr\_TWEIO and (b) Pr\_GMCA indices (calculated based on the CMAP precipitation dataset) during P1. (c)-(d) are the same as (a)-(b) but during P2. The dots indicate the SLP anomalies exceeding the 95% confidence level.

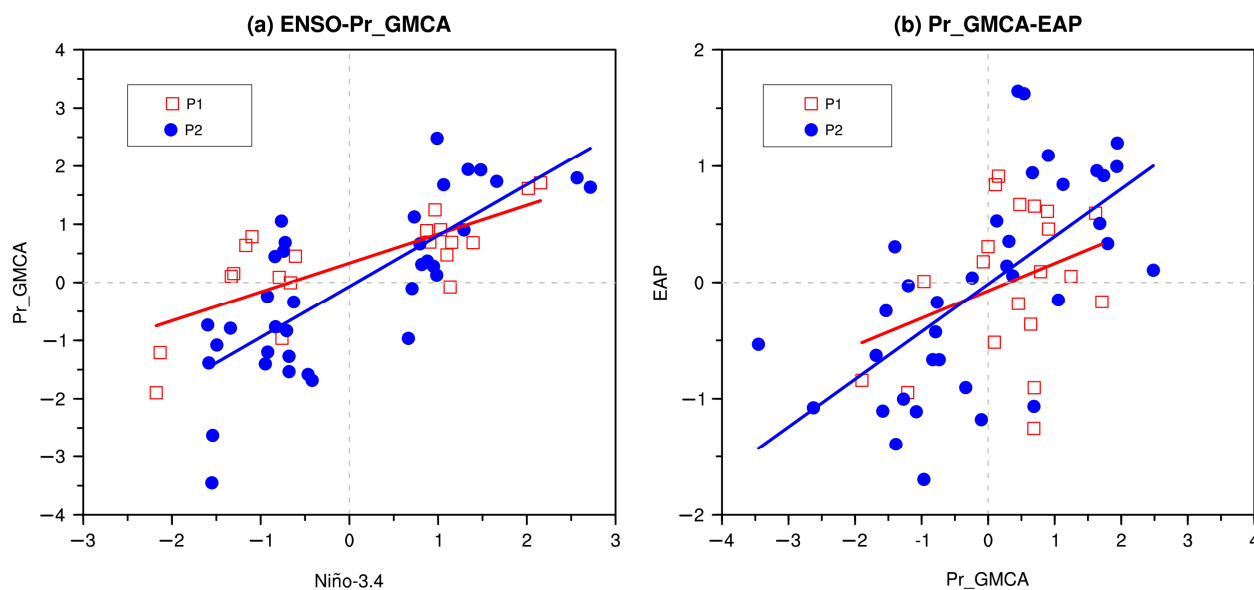

**Figure S6.** (a) Scatterplot the early winter monthly Pr\_GMCA (calculated based on the CMAP precipitation dataset) and Niño-3.4 indices for the ENSO winters during P1 (red quadrate) and P2 (blue circle) with the corresponding linear regression lines. (b) Scatterplot the early winter monthly EAP and Pr\_GMCA (calculated based on the CMAP precipitation dataset) indices for the ENSO winters during P1 (red quadrate) and P2 (blue circle). The correlation coefficients (R) are also displayed.
